# Supplementary material for: Therapeutic Potential of Polyscias fruticosa (L.) Harms Leaf Extract for Parkinson’s Disease Treatment by Drosophila melanogaster Model
Source: Hindawi journal article supplement (doi:10.1155/2022/5262677), 2022-01-01
Supplement: f1 [file 5262677.f1.pdf]

## Supplementary Materials

Table S1: Phytochemical constituents of *P. fruticosa* leaves

| Metabolites             | Diethyl ether extract | Ethanol extract |            | Aqueous extract |            | Presence |
|-------------------------|-----------------------|-----------------|------------|-----------------|------------|----------|
|                         |                       | Non-hydrolysis  | Hydrolysis | Non-hydrolysis  | Hydrolysis |          |
| Lipids                  | -                     | ND              | ND         | ND              | ND         | -        |
| Carotenoids             | -                     | ND              | ND         | ND              | ND         | -        |
| Volatile oils           | +                     | ND              | ND         | ND              | ND         | +        |
| Free triterpenoids      | +                     | ND              | ND         | ND              | +          | +        |
| Triterpenoid hydrolysis | ND                    | ND              | +          | ND              | +          | +        |
| Alkaloids               | -                     | +               | ND         | +               | ND         | +        |
| Coumarins               | -                     | -               | ND         | -               | ND         | -        |
| Anthraglycosides        |                       | ND              | ND         | -               | ND         | -        |
| Flavonoids              | -                     | +               | +          | +               | +          | +        |
| Anthocyanosides         | ND                    | +               | ND         | +               | ND         | +        |
| Proanthocyanidins       | ND                    | +               | ND         | +               | ND         | +        |
| Tannins                 | ND                    | +               | ND         | +               | ND         | +        |
| Saponins                | ND                    | +               | ND         | +               | ND         | +        |
| Organic acids           | ND                    | +               | ND         | +               | ND         | +        |
| Reducing agents         | ND                    | +               | ND         | +               | ND         | +        |
| Polyuronic              | ND                    |                 | ND         | -               | ND         | -        |

(+): the presence; (-): the absence; ND: not determined

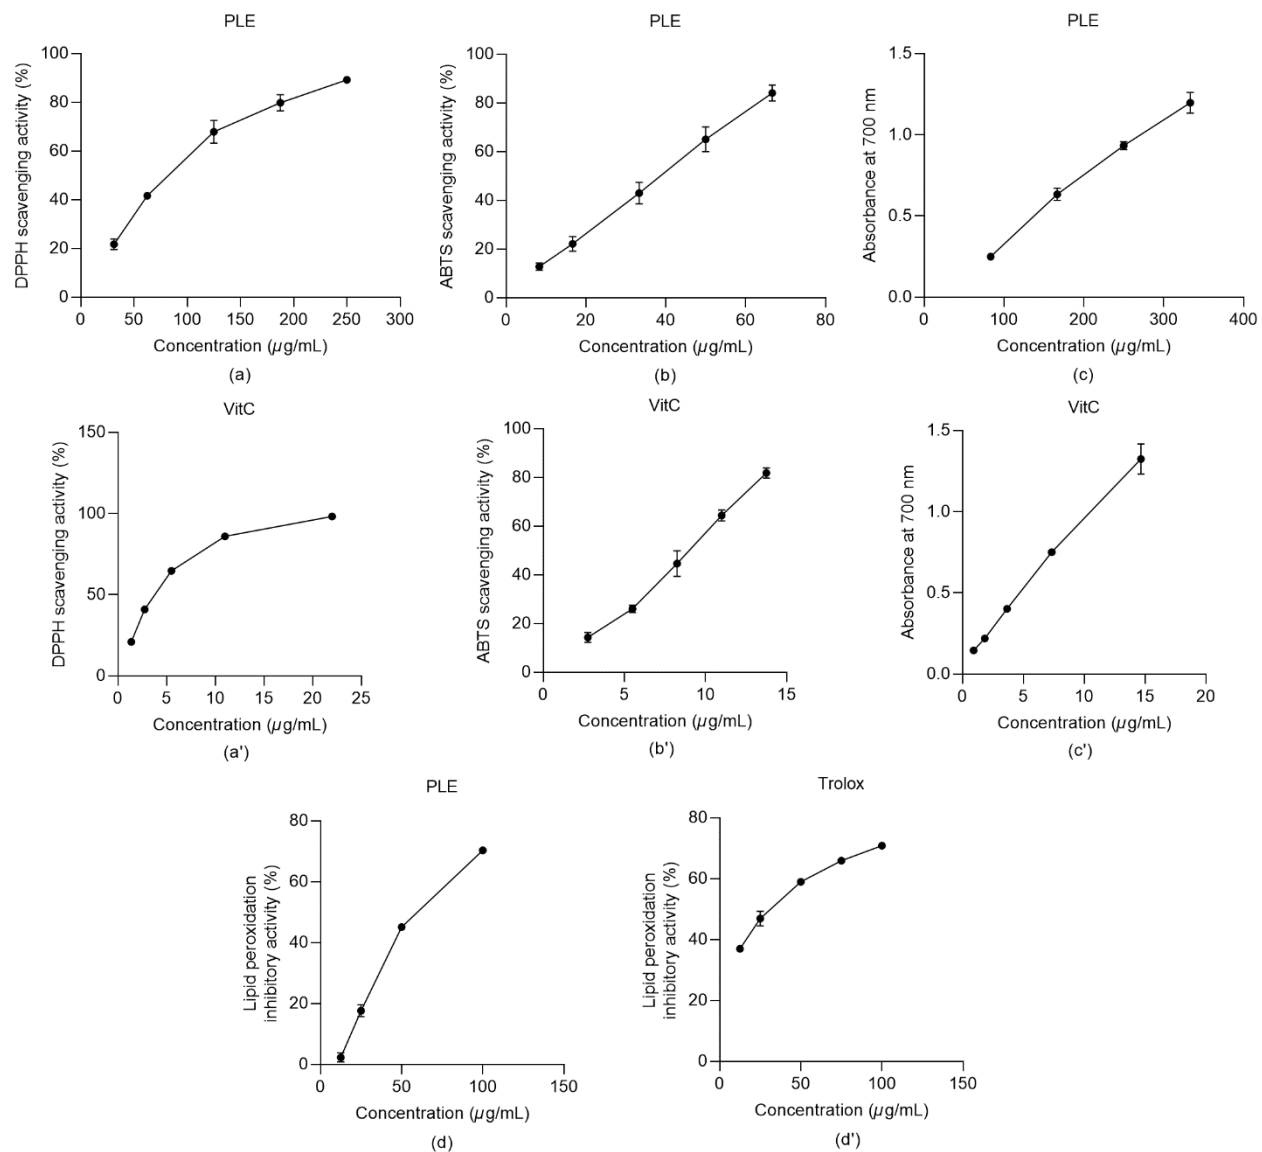

Figure S1: Antioxidant capacity of *P. fruticosa* leaf extract. (a, a') DPPH radical scavenging activity of PLE and vitamin C; (b, b') ABTS radical cation decolorization activity of PLE and vitamin C; (c, c') Reducing power activity of PLE and vitamin C; (d, d') Inhibition of lipid peroxidation of PLE and vitamin C;  $n = 3$  and error bars represent the standard deviation of data.

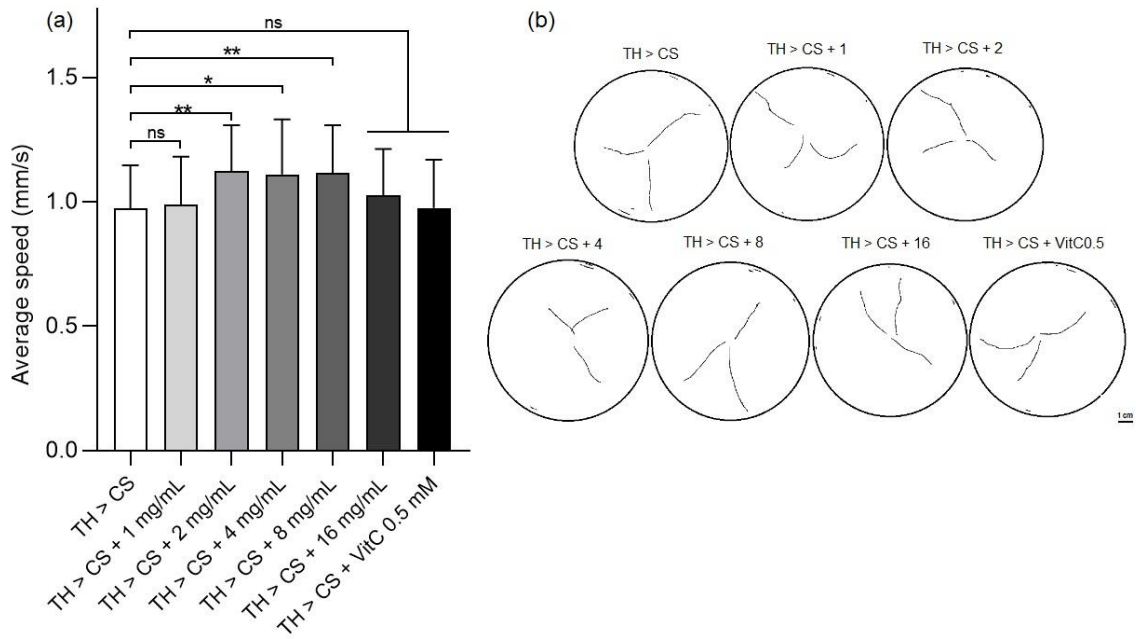

Figure S2: The effects of *P. fruticosa* leaf extract on the locomotive ability of control larvae. (a) Average crawling speeds of third-instar larvae. The control line TH-GAL4 (+; +; *TH-GAL4*/+). Error bars represent the standard deviation of data. VitC: 0.5 mM vitamin C.  $n = 45$ , one-way ANOVA: Tukey's test: \*  $p < 0.05$ , \*\*  $p < 0.01$ . (b) Images show the motion paths of control larvae (TH > CS), control larvae treated with PLE at different concentrations (TH > CS + 1-16) and 0.5 mM vitamin C (TH > CS + VitC0.5).

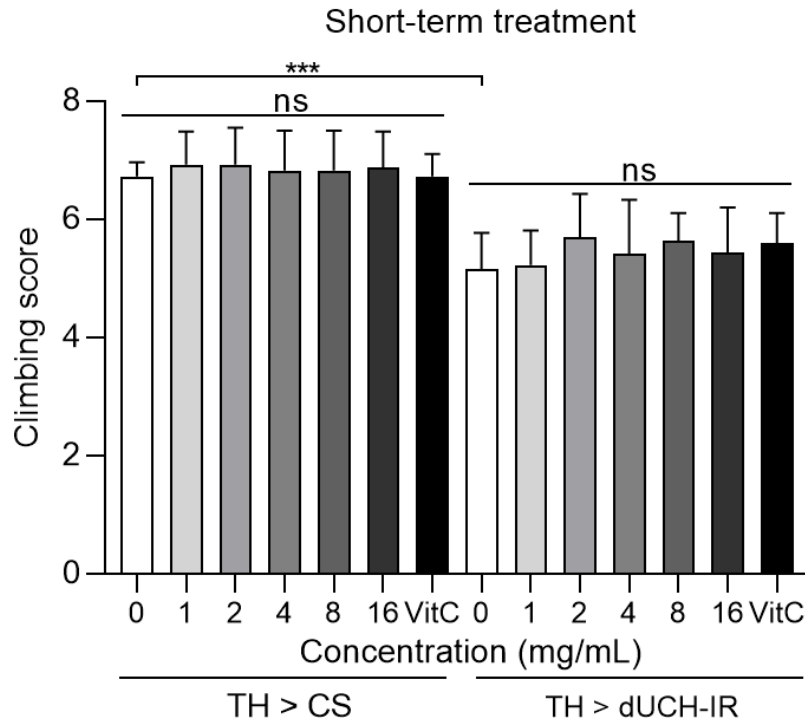

Figure S3: The effects of short-term treatment with *P. fruticosa* leaf extract on the climbing ability of 5-day-old adult flies. Short-term treatment: the treatment was carried out from the embryonic stage and interrupted after the third larval stage. Population size  $N = 10$  and biological replication  $n = 8$ ; Mann-Whitney test, ns: not significant,  $^{ns}p > 0.05$ ,  $^{***}p < 0.001$ . The control line TH-GAL4 (+; +; *TH-GAL4/+*) and the dUCH-knockdown line TH > dUCH-IR (+; +; *TH-GAL4/UAS-dUCH-IR*). Error bars represent the standard deviation of data. VitC: 0.5 mM vitamin C.
